# Supplementary material for: A Double-Blind, Randomized, Placebo-Controlled Trial of the Effect of 1-Kestose on Defecation Habits in Constipated Kindergarten Children: A Pilot Study
Source: MDPI journal article supplement (doi:10.3390/nu15143276), 2023-07-24
Supplement: s1 [file s1]

**Supplemental Table S1.** Participant characteristics

|                                                                    | <b>Kestose</b><br>( <i>n</i> =11) | <b>Maltose</b><br>( <i>n</i> =12) | <b><i>p</i></b> |
|--------------------------------------------------------------------|-----------------------------------|-----------------------------------|-----------------|
| Age at entry, years, median (25 <sup>th</sup> –75 <sup>th</sup> %) | 5 (4.5-5.5)                       | 5 (5-6)                           | 0.36            |
| Sex, boy/girl                                                      | 6/5                               | 9/3                               | 0.30            |
| Taking pre/probiotics                                              | 5                                 | 6                                 | 0.48            |
| Taking laxatives                                                   | 2                                 | 1                                 | 0.83            |

Pre/probiotics: yogurt, lactic-fermented beverage, health foods (oligosaccharides, dietary fiber)
