# Supplementary material for: A Double-Blind, Randomized, Placebo-Controlled Trial of the Effect of 1-Kestose on Defecation Habits in Constipated Kindergarten Children: A Pilot Study
Source: Nutrients. 2023 Jul 24;15(14):3276. doi: 10.3390/nu15143276 (PMC10386190; doi:10.3390/nu15143276)
Supplement: Supplementary file 1 [file nutrients-15-03276-s001.zip]

Archive with 5 entries (5 files):
- Supplemental Figure S1_np.pdf
- Supplemental Figure S2_np.pdf
- Supplemental Figure S3_np.pdf
- Supplemental Figure S4_np.pdf
- Supplemental Table S1_np.pdf
