# Supplementary figures and images for: A Double-Blind, Randomized, Placebo-Controlled Trial of the Effect of 1-Kestose on Defecation Habits in Constipated Kindergarten Children: A Pilot Study
Source: MDPI journal article supplement (doi:10.3390/nu15143276), 2023-07-24

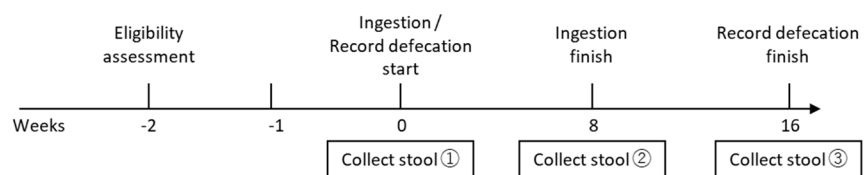

**Supplemental Figure S2.** Test schedule

Supplement: s1 [file s1]

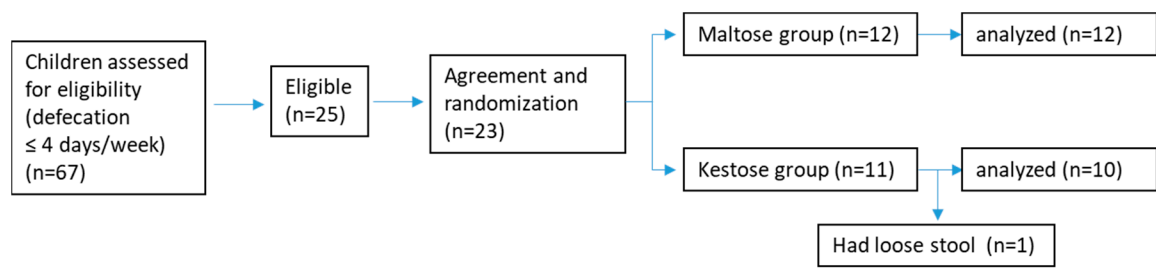

**Supplemental Figure S3** Flowchart of the study recruitment

Supplement: s1 [file s1]

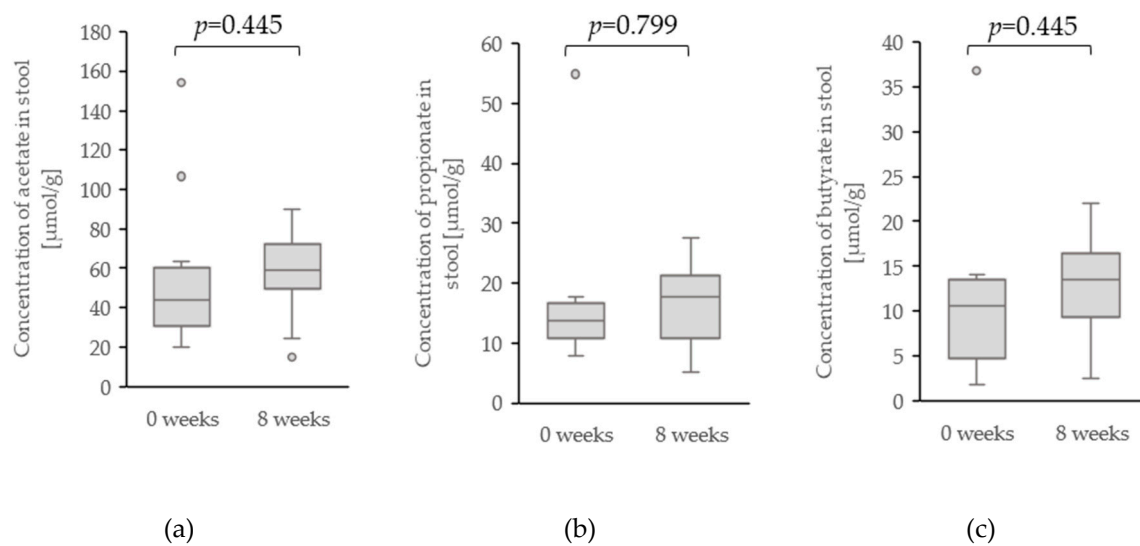

**Supplemental Figure S4.** SCFA concentration in stool. a) Acetate; b) propionate; c) butyrate

Supplement: s1 [file s1]

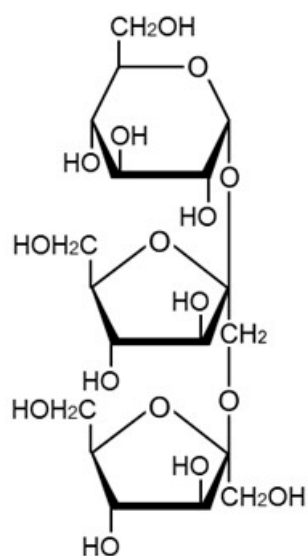

**Supplemental Figure S1.** 1-kestose  
 a fructose molecule connected to sucrose by a (1 → 2β)  
 glycosidic bond

Supplement: s1 [file s1]
